# Supplementary material for: 3D Printed Voltammetric Sensor Modified with an Fe(III)-Cluster for the Enzyme-Free Determination of Glucose in Sweat
Source: MDPI journal article supplement (doi:10.3390/bios12121156), 2022-12-11
Supplement: s1 [file s1]

## Supplementary Material

### 3D Printed Voltammetric Sensor Modified with an Fe(III)-Cluster for the Enzyme-Free Determination of Glucose in Sweat

Eleni Koukouviti<sup>1</sup>, Alexios K. Plessas<sup>2</sup>, Anastasios Economou<sup>1</sup>, Nikolaos Thomaidis<sup>1</sup>, Giannis S. Papaefstathiou<sup>2</sup>, Christos Kokkinos<sup>1\*</sup>

<sup>1</sup>*Laboratory of Analytical Chemistry, Department of Chemistry, National and Kapodistrian University of Athens, 15771 Athens, Greece*

<sup>2</sup>*Laboratory of Inorganic Chemistry, Department of Chemistry, National and Kapodistrian University of Athens, 15771 Athens, Greece*

TableS1. The reported crystal structures containing the  $[\text{Fe}_3\text{O}(\text{PhCOO}_2)_6(\text{H}_2\text{O})_3]^+$  moiety.

| Refcode | Chemical Formula                                                                                                                                                    | Ref |
|---------|---------------------------------------------------------------------------------------------------------------------------------------------------------------------|-----|
| DEQWEC  | $[\text{Fe}_3\text{O}(\text{PhCOO}_2)_6(\text{H}_2\text{O})_3]\text{NO}_3 \cdot 3\text{MeCN}$                                                                       | [1] |
| IMUMUZ  | $[\text{Fe}_3\text{O}(\text{PhCOO}_2)_6(\text{H}_2\text{O})_3]\text{ClO}_4 \cdot 3\text{MeCN}$                                                                      | [2] |
| TURJOF  | $(\text{C}_5\text{H}_5\text{ClN})[\text{Fe}_3\text{O}(\text{PhCOO}_2)_6(\text{H}_2\text{O})_3](\text{C}_7\text{H}_7\text{O}_3\text{S})_2 \cdot 2\text{H}_2\text{O}$ | [3] |

Table S2. Crystal data and structure refinement for  $[\text{Fe}_3\text{O}(\text{PhCO}_2)_6(\text{H}_2\text{O})_3]\cdot\text{PhCO}_2$

|                                            |                                                                                  |
|--------------------------------------------|----------------------------------------------------------------------------------|
| <b>Empirical formula</b>                   | $[\text{Fe}_3\text{O}(\text{PhCO}_2)_6(\text{H}_2\text{O})_3]\cdot\text{PhCO}_2$ |
| <b>Formula weight</b>                      | 1085.39                                                                          |
| <b>Temperature</b>                         | 297 K                                                                            |
| <b>Wavelength (Cu Ka)</b>                  | 1.54059 Å                                                                        |
| <b>Crystal system</b>                      | orthorhombic                                                                     |
| <b>Space group</b>                         | P 2 <sub>1</sub> 2 <sub>1</sub> 2 <sub>1</sub>                                   |
| <b>Unit cell dimensions</b>                | a = 18.52596 Å, α = 90.000°                                                      |
|                                            | b = 19.17324 Å, β = 90.000°                                                      |
|                                            | c = 15.83827 Å, γ = 90.000°                                                      |
| <b>Volume</b>                              | 5625.795 Å <sup>3</sup>                                                          |
| <b>Z</b>                                   | 4                                                                                |
| <b>Density (calculated)</b>                | 1.274 g/cm <sup>3</sup>                                                          |
| <b>θ range for data collection</b>         | 3 to 30°                                                                         |
| <b>Number of reflections (Bragg peaks)</b> | 149                                                                              |
| <b>Number of independent atoms</b>         | 105                                                                              |
| <b>R<sub>p</sub></b>                       | 3.883                                                                            |
| <b>R<sub>wp</sub></b>                      | 5.513                                                                            |
| <b>Profile Function</b>                    | Pseudo-Voigt                                                                     |

Table S3. Atomic coordinates ( $\times 10^4$ ) and equivalent isotropic displacement parameters ( $\text{\AA}^2 \times 10^3$ ) for  $[\text{Fe}_3\text{O}(\text{PhCO}_2)_6(\text{H}_2\text{O})_3] \cdot \text{PhCO}_2$ .

| Label | x    | y     | z    | Ueq  |
|-------|------|-------|------|------|
| Fe(1) | 3569 | 9262  | 5285 | 12.7 |
| Fe(2) | 3910 | 7857  | 6409 | 12.7 |
| Fe(3) | 2496 | 8831  | 6863 | 12.7 |
| O(1)  | 3317 | 8648  | 6177 | 38   |
| O(2)  | 2990 | 8686  | 7965 | 38   |
| O(3)  | 3813 | 7882  | 7665 | 38   |
| O(4)  | 3075 | 7182  | 6307 | 38   |
| O(5)  | 2166 | 7824  | 6795 | 38   |
| O(6)  | 4127 | 7614  | 5199 | 38   |
| O(7)  | 3805 | 8528  | 4420 | 38   |
| O(8)  | 4807 | 8445  | 6504 | 38   |
| O(9)  | 4611 | 9342  | 5629 | 38   |
| O(10) | 1837 | 9023  | 5904 | 38   |
| O(11) | 2549 | 9264  | 4821 | 38   |
| O(12) | 2683 | 9852  | 7003 | 38   |
| O(13) | 3368 | 10143 | 5889 | 38   |
| O(14) | 3826 | 9936  | 4273 | 38   |
| O(15) | 4566 | 6998  | 6654 | 38   |
| O(16) | 1577 | 8954  | 7619 | 38   |
| C(1)  | 4971 | 9019  | 6170 | 38   |
| C(2)  | 5660 | 9357  | 6489 | 38   |
| C(3)  | 5674 | 10071 | 6610 | 38   |
| C(4)  | 6296 | 10376 | 6929 | 38   |
| C(5)  | 6888 | 9984  | 7098 | 38   |
| C(6)  | 6879 | 9280  | 6958 | 38   |
| C(7)  | 6275 | 8966  | 6651 | 38   |
| C(8)  | 4013 | 7908  | 4509 | 38   |
| C(9)  | 4130 | 7470  | 3729 | 38   |

| <b>Label</b> | <b>x</b> | <b>y</b> | <b>z</b> | <b>Ueq</b> |
|--------------|----------|----------|----------|------------|
| C(10)        | 4457     | 7756     | 3029     | 38         |
| C(11)        | 4565     | 7321     | 2339     | 38         |
| C(12)        | 4378     | 6662     | 2353     | 38         |
| C(13)        | 4060     | 6371     | 3032     | 38         |
| C(14)        | 3918     | 6783     | 3726     | 38         |
| C(15)        | 2420     | 7280     | 6473     | 38         |
| C(16)        | 1886     | 6701     | 6244     | 38         |
| C(17)        | 1572     | 6703     | 5457     | 38         |
| C(18)        | 1042     | 6174     | 5289     | 38         |
| C(19)        | 927      | 5662     | 5904     | 38         |
| C(20)        | 1200     | 5668     | 6663     | 38         |
| C(21)        | 1695     | 6204     | 6853     | 38         |
| C(22)        | 3510     | 8284     | 8156     | 38         |
| C(23)        | 3751     | 8291     | 9073     | 38         |
| C(24)        | 3743     | 7702     | 9531     | 38         |
| C(25)        | 3995     | 7666     | 10380    | 38         |
| C(26)        | 4240     | 8269     | 10716    | 38         |
| C(27)        | 4256     | 8867     | 10284    | 38         |
| C(28)        | 4007     | 8898     | 9443     | 38         |
| C(29)        | 3033     | 10284    | 6558     | 38         |
| C(30)        | 3037     | 11028    | 6862     | 38         |
| C(31)        | 3484     | 11519    | 6529     | 38         |
| C(32)        | 3499     | 12187    | 6857     | 38         |
| C(33)        | 3027     | 12378    | 7443     | 38         |
| C(34)        | 2565     | 11899    | 7796     | 38         |
| C(35)        | 2558     | 11236    | 7481     | 38         |
| C(36)        | 1934     | 9158     | 5132     | 38         |
| C(37)        | 1312     | 9188     | 4554     | 38         |
| C(38)        | 1043     | 8575     | 4182     | 38         |
| C(39)        | 452      | 8620     | 3638     | 38         |
| C(40)        | 153      | 9240     | 3474     | 38         |

| Label | x    | y     | z    | Ueq |
|-------|------|-------|------|-----|
| C(41) | 399  | 9840  | 3831 | 38  |
| C(42) | 986  | 9821  | 4373 | 38  |
| O(17) | 3747 | 12050 | 4213 | 38  |
| O(18) | 3982 | 12132 | 5600 | 38  |
| C(43) | 3727 | 12361 | 4912 | 38  |
| C(44) | 3367 | 13064 | 4947 | 38  |
| C(45) | 3784 | 13662 | 4963 | 38  |
| C(46) | 3476 | 14309 | 4961 | 38  |
| C(47) | 2738 | 14361 | 5004 | 38  |
| C(48) | 2328 | 13794 | 4976 | 38  |
| C(49) | 2638 | 13139 | 4992 | 38  |

Table S4. List of Bragg positions (shown as blue dashes in Figure 1) from the Rietveld Analysis of  $[\text{Fe}_3\text{O}(\text{PhCO}_2)_6(\text{H}_2\text{O})_3]\cdot\text{PhCO}_2$ .

| 2 $\theta$ | h k l | d     | Fo     | Fc     | 2 $\theta$ | h k l | d    | Fo     | Fc     |
|------------|-------|-------|--------|--------|------------|-------|------|--------|--------|
| 6.64       | 1 1 0 | 13.31 | 215.30 | 298.18 | 23.70      | 1 5 0 | 3.75 | 43.64  | 29.05  |
| 7.24       | 0 1 1 | 12.20 | 151.98 | 202.22 | 23.73      | 4 3 0 | 3.75 | 61.60  | 90.18  |
| 7.34       | 1 0 1 | 12.03 | 147.26 | 215.07 | 23.73      | 2 4 2 | 3.75 | 48.34  | 34.46  |
| 8.67       | 1 1 1 | 10.19 | 85.86  | 166.27 | 23.88      | 0 5 1 | 3.72 | 53.72  | 90.96  |
| 9.23       | 0 2 0 | 9.58  | 124.17 | 177.29 | 23.88      | 2 3 3 | 3.72 | 43.39  | 43.54  |
| 9.55       | 2 0 0 | 9.25  | 114.42 | 229.97 | 24.04      | 3 2 3 | 3.70 | 144.92 | 40.59  |
| 10.39      | 1 2 0 | 8.51  | 95.86  | 207.41 | 24.12      | 4 2 2 | 3.69 | 63.46  | 106.13 |
| 10.61      | 2 1 0 | 8.33  | 90.67  | 154.33 | 24.17      | 3 4 1 | 3.68 | 203.93 | 109.60 |
| 10.79      | 0 2 1 | 8.19  | 72.22  | 152.92 | 24.32      | 0 2 4 | 3.66 | 140.12 | 54.57  |
| 11.07      | 2 0 1 | 7.99  | 136.44 | 157.54 | 24.36      | 1 5 1 | 3.65 | 106.80 | 41.29  |
| 11.17      | 0 0 2 | 7.91  | 83.63  | 100.51 | 24.39      | 4 3 1 | 3.65 | 186.78 | 75.43  |

| <b>2<math>\theta</math></b> | <b>h k l</b> | <b>d</b> | <b>Fo</b> | <b>Fc</b> | <b>2<math>\theta</math></b> | <b>h k l</b> | <b>d</b> | <b>Fo</b> | <b>Fc</b> |
|-----------------------------|--------------|----------|-----------|-----------|-----------------------------|--------------|----------|-----------|-----------|
| 11.80                       | 1 2 1        | 7.49     | 121.51    | 165.80    | 24.45                       | 2 0 4        | 3.64     | 128.23    | 200.10    |
| 11.99                       | 2 1 1        | 7.37     | 65.50     | 109.12    | 24.47                       | 5 1 0        | 3.63     | 66.50     | 0.27      |
| 12.09                       | 0 1 2        | 7.31     | 43.52     | 147.96    | 24.68                       | 5 0 1        | 3.60     | 54.44     | 86.54     |
| 12.16                       | 1 0 2        | 7.28     | 142.50    | 219.72    | 24.80                       | 1 2 4        | 3.59     | 148.07    | 77.76     |
| 13.01                       | 1 1 2        | 6.80     | 85.45     | 89.78     | 24.89                       | 2 1 4        | 3.57     | 128.80    | 112.21    |
| 13.29                       | 2 2 0        | 6.66     | 38.21     | 65.79     | 25.10                       | 0 4 3        | 3.55     | 29.50     | 56.13     |
| 14.43                       | 2 2 1        | 6.13     | 52.46     | 134.31    | 25.12                       | 5 1 1        | 3.54     | 45.73     | 75.46     |
| 14.51                       | 0 2 2        | 6.10     | 44.16     | 78.32     | 25.14                       | 2 5 0        | 3.54     | 309.99    | 36.26     |
| 14.66                       | 1 3 0        | 6.04     | 19.28     | 152.98    | 25.56                       | 1 4 3        | 3.48     | 0.00      | 126.53    |
| 14.72                       | 2 0 2        | 6.01     | 30.69     | 96.77     | 25.59                       | 4 0 3        | 3.48     | 0.00      | 70.38     |
| 14.95                       | 0 3 1        | 5.92     | 123.98    | 229.30    | 25.77                       | 2 5 1        | 3.45     | 94.26     | 71.27     |
| 15.07                       | 3 1 0        | 5.87     | 1.95      | 20.95     | 25.78                       | 5 2 0        | 3.45     | 171.31    | 100.26    |
| 15.28                       | 1 2 2        | 5.79     | 128.23    | 191.24    | 25.82                       | 0 5 2        | 3.45     | 166.21    | 73.09     |
| 15.40                       | 3 0 1        | 5.75     | 82.98     | 123.73    | 26.01                       | 4 1 3        | 3.42     | 94.69     | 85.68     |
| 15.43                       | 2 1 2        | 5.74     | 50.23     | 116.61    | 26.09                       | 3 4 2        | 3.41     | 11.63     | 56.40     |
| 15.70                       | 1 3 1        | 5.64     | 54.14     | 50.38     | 26.18                       | 2 2 4        | 3.40     | 100.57    | 119.94    |
| 16.08                       | 3 1 1        | 5.51     | 143.41    | 132.85    | 26.22                       | 3 3 3        | 3.40     | 121.49    | 50.18     |
| 16.86                       | 2 3 0        | 5.26     | 85.97     | 204.10    | 26.27                       | 1 5 2        | 3.39     | 136.04    | 31.58     |
| 17.08                       | 3 2 0        | 5.19     | 0.00      | 136.04    | 26.30                       | 4 3 2        | 3.39     | 184.02    | 18.40     |
| 17.40                       | 2 2 2        | 5.09     | 104.35    | 76.22     | 26.40                       | 5 2 1        | 3.37     | 112.02    | 100.21    |
| 17.42                       | 0 1 3        | 5.09     | 86.80     | 347.20    | 26.48                       | 0 3 4        | 3.36     | 141.72    | 0.09      |
| 17.47                       | 1 0 3        | 5.07     | 309.32    | 132.40    | 26.56                       | 5 0 2        | 3.35     | 159.90    | 21.82     |
| 17.77                       | 2 3 1        | 4.99     | 41.64     | 178.75    | 26.75                       | 3 0 4        | 3.33     | 60.96     | 118.85    |
| 17.84                       | 0 3 2        | 4.97     | 191.67    | 1.54      | 26.77                       | 4 4 0        | 3.33     | 106.65    | 116.15    |
| 17.98                       | 3 2 1        | 4.93     | 129.43    | 127.15    | 26.91                       | 2 4 3        | 3.31     | 156.49    | 48.91     |
| 18.08                       | 1 1 3        | 4.90     | 213.04    | 115.43    | 26.92                       | 1 3 4        | 3.31     | 86.37     | 56.10     |
| 18.22                       | 3 0 2        | 4.87     | 128.38    | 171.05    | 26.97                       | 5 1 2        | 3.30     | 233.77    | 128.55    |

| <b>2θ</b> | <b>h k l</b> | <b>d</b> | <b>Fo</b> | <b>Fc</b> | <b>2θ</b> | <b>h k l</b> | <b>d</b> | <b>Fo</b> | <b>Fc</b> |
|-----------|--------------|----------|-----------|-----------|-----------|--------------|----------|-----------|-----------|
| 18.47     | 1 3 2        | 4.80     | 159.29    | 171.85    | 27.16     | 3 1 4        | 3.28     | 129.30    | 72.53     |
| 18.51     | 0 4 0        | 4.79     | 128.75    | 88.22     | 27.25     | 4 2 3        | 3.27     | 7.81      | 71.16     |
| 18.80     | 3 1 2        | 4.72     | 251.68    | 283.47    | 27.37     | 4 4 1        | 3.26     | 95.86     | 117.14    |
| 19.13     | 1 4 0        | 4.64     | 274.01    | 34.24     | 27.38     | 3 5 0        | 3.25     | 204.99    | 248.59    |
| 19.16     | 4 0 0        | 4.63     | 104.32    | 365.91    | 27.58     | 2 5 2        | 3.23     | 80.07     | 87.06     |
| 19.19     | 0 2 3        | 4.62     | 75.42     | 65.71     | 27.83     | 5 3 0        | 3.20     | 67.44     | 3.75      |
| 19.35     | 0 4 1        | 4.58     | 108.76    | 27.83     | 27.92     | 0 6 0        | 3.19     | 34.02     | 163.33    |
| 19.35     | 2 0 3        | 4.58     | 117.36    | 73.18     | 27.97     | 3 5 1        | 3.19     | 113.24    | 104.90    |
| 19.72     | 4 1 0        | 4.50     | 282.30    | 299.51    | 28.17     | 5 2 2        | 3.16     | 62.91     | 97.61     |
| 19.79     | 1 2 3        | 4.48     | 238.67    | 175.82    | 28.21     | 2 3 4        | 3.16     | 118.92    | 121.06    |
| 19.91     | 2 1 3        | 4.46     | 83.74     | 145.06    | 28.34     | 1 6 0        | 3.15     | 178.33    | 25.87     |
| 19.94     | 1 4 1        | 4.45     | 54.48     | 168.13    | 28.35     | 3 2 4        | 3.15     | 124.29    | 83.06     |
| 19.98     | 4 0 1        | 4.44     | 117.02    | 63.52     | 28.41     | 5 3 1        | 3.14     | 138.29    | 30.62     |
| 20.00     | 3 3 0        | 4.44     | 277.26    | 88.61     | 28.50     | 0 6 1        | 3.13     | 176.97    | 101.22    |
| 20.27     | 2 3 2        | 4.38     | 91.97     | 103.27    | 28.56     | 0 1 5        | 3.12     | 155.98    | 46.43     |
| 20.46     | 3 2 2        | 4.34     | 138.47    | 97.98     | 28.59     | 1 0 5        | 3.12     | 83.69     | 174.65    |
| 20.51     | 4 1 1        | 4.33     | 50.86     | 18.90     | 28.78     | 0 5 3        | 3.10     | 0.00      | 45.07     |
| 20.78     | 3 3 1        | 4.27     | 262.38    | 59.47     | 28.91     | 1 6 1        | 3.09     | 0.00      | 15.33     |
| 20.87     | 2 4 0        | 4.25     | 103.73    | 128.34    | 28.92     | 6 0 0        | 3.08     | 0.00      | 160.83    |
| 21.31     | 4 2 0        | 4.17     | 65.67     | 141.11    | 28.98     | 1 1 5        | 3.08     | 41.17     | 99.11     |
| 21.48     | 2 2 3        | 4.13     | 190.50    | 172.51    | 29.02     | 3 4 3        | 3.07     | 46.84     | 63.06     |
| 21.62     | 2 4 1        | 4.11     | 43.36     | 163.10    | 29.09     | 4 4 2        | 3.07     | 54.65     | 24.91     |
| 21.67     | 0 4 2        | 4.10     | 177.83    | 1.45      | 29.19     | 1 5 3        | 3.06     | 56.21     | 51.34     |
| 21.84     | 0 3 3        | 4.07     | 102.45    | 83.61     | 29.21     | 4 3 3        | 3.05     | 58.30     | 139.95    |
| 22.04     | 4 2 1        | 4.03     | 93.10     | 143.54    | 29.26     | 0 4 4        | 3.05     | 50.93     | 72.00     |
| 22.15     | 3 0 3        | 4.01     | 189.04    | 83.03     | 29.30     | 6 1 0        | 3.05     | 32.60     | 62.69     |
| 22.21     | 1 4 2        | 4.00     | 132.92    | 50.77     | 29.45     | 5 0 3        | 3.03     | 34.21     | 23.41     |

| <b>2θ</b> | <b>h k l</b> | <b>d</b> | <b>Fo</b> | <b>Fc</b> | <b>2θ</b> | <b>h k l</b> | <b>d</b> | <b>Fo</b> | <b>Fc</b> |
|-----------|--------------|----------|-----------|-----------|-----------|--------------|----------|-----------|-----------|
| 22.24     | 4 0 2        | 3.99     | 218.49    | 328.49    | 29.48     | 6 0 1        | 3.03     | 30.41     | 152.10    |
| 22.37     | 1 3 3        | 3.97     | 128.33    | 42.87     | 29.57     | 2 6 0        | 3.02     | 77.48     | 53.51     |
| 22.46     | 0 0 4        | 3.96     | 0.00      | 43.23     | 29.66     | 3 5 2        | 3.01     | 48.76     | 61.46     |
| 22.64     | 3 1 3        | 3.92     | 0.00      | 99.69     | 29.66     | 1 4 4        | 3.01     | 49.21     | 37.87     |
| 22.72     | 4 1 2        | 3.91     | 1.06      | 81.49     | 29.69     | 4 0 4        | 3.01     | 87.26     | 4.19      |
| 22.94     | 0 1 4        | 3.87     | 72.58     | 155.95    | 29.71     | 0 2 5        | 3.01     | 106.29    | 49.23     |
| 22.96     | 3 3 2        | 3.87     | 81.18     | 148.15    | 29.81     | 2 0 5        | 2.99     | 106.82    | 5.65      |
| 22.97     | 1 0 4        | 3.87     | 228.59    | 92.67     | 29.83     | 5 1 3        | 2.99     | 45.87     | 31.86     |
| 23.44     | 1 1 4        | 3.79     | 30.59     | 3.02      | 29.85     | 6 1 1        | 2.99     | 44.40     | 14.26     |
| 23.50     | 3 4 0        | 3.78     | 69.95     | 24.63     |           |              |          |           |           |



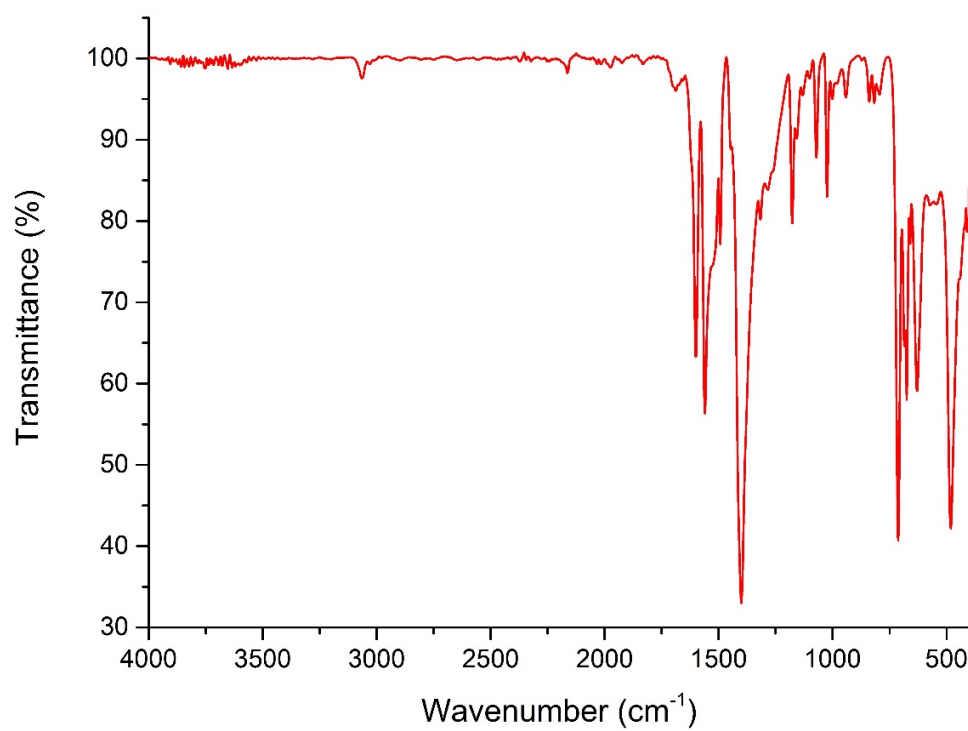

Figure S1. The IR spectrum (ATR) of  $[Fe_3O(PhCO_2)_6(H_2O)_3] \cdot PhCO_2$  in the 450 – 4000  $cm^{-1}$  range.

## Particle size analysis

The particle size was calculated using ImageJ v. 1.53t software [4], using an image taken on a Leica M205 C stereoscope equipped with a Leica DMC5400 - 20 Megapixel camera. The image was taken from a sample of  $[\text{Fe}_3\text{O}(\text{PhCO}_2)_6(\text{H}_2\text{O})_3]\cdot\text{PhCO}_2$ , dispersed in water, on a glass slide.

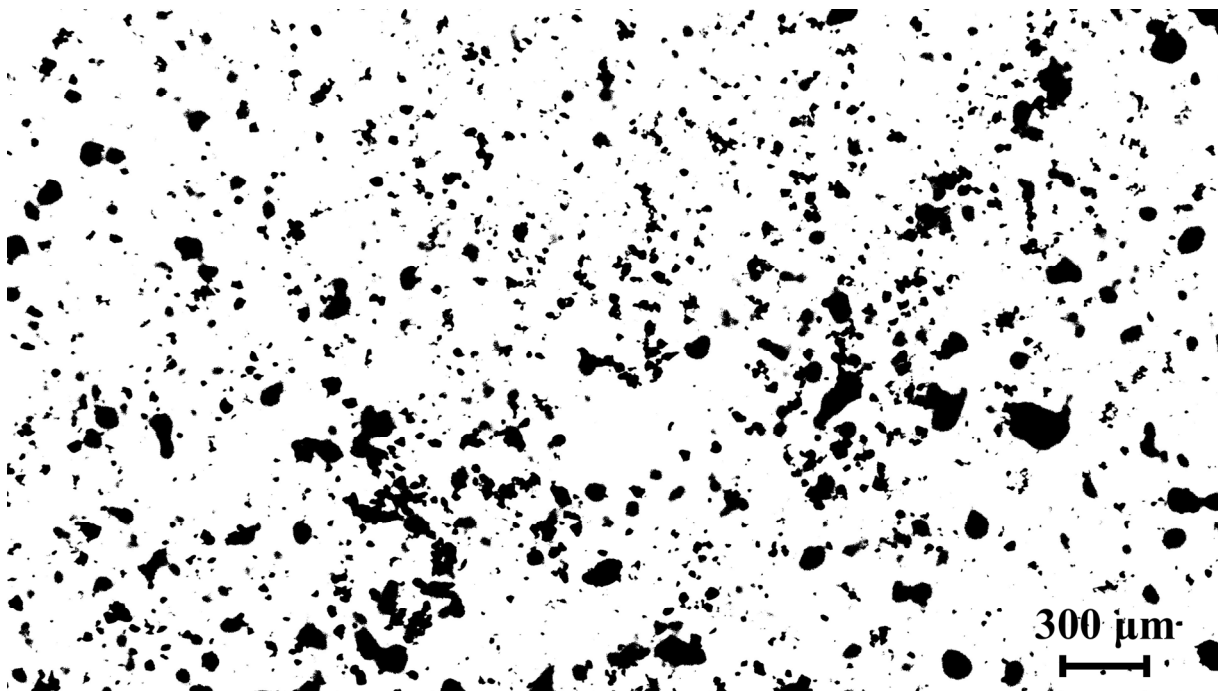

*Figure S2. Image of  $[\text{Fe}_3\text{O}(\text{PhCO}_2)_6(\text{H}_2\text{O})_3]\cdot\text{PhCO}_2$  dispersed in water on a glass slide.*

From the gaussian fit of the measurements from ImageJ, the particle size ranges from 50 to 230  $\mu\text{m}$  and the average particle size is 54.66  $\mu\text{m}$ .

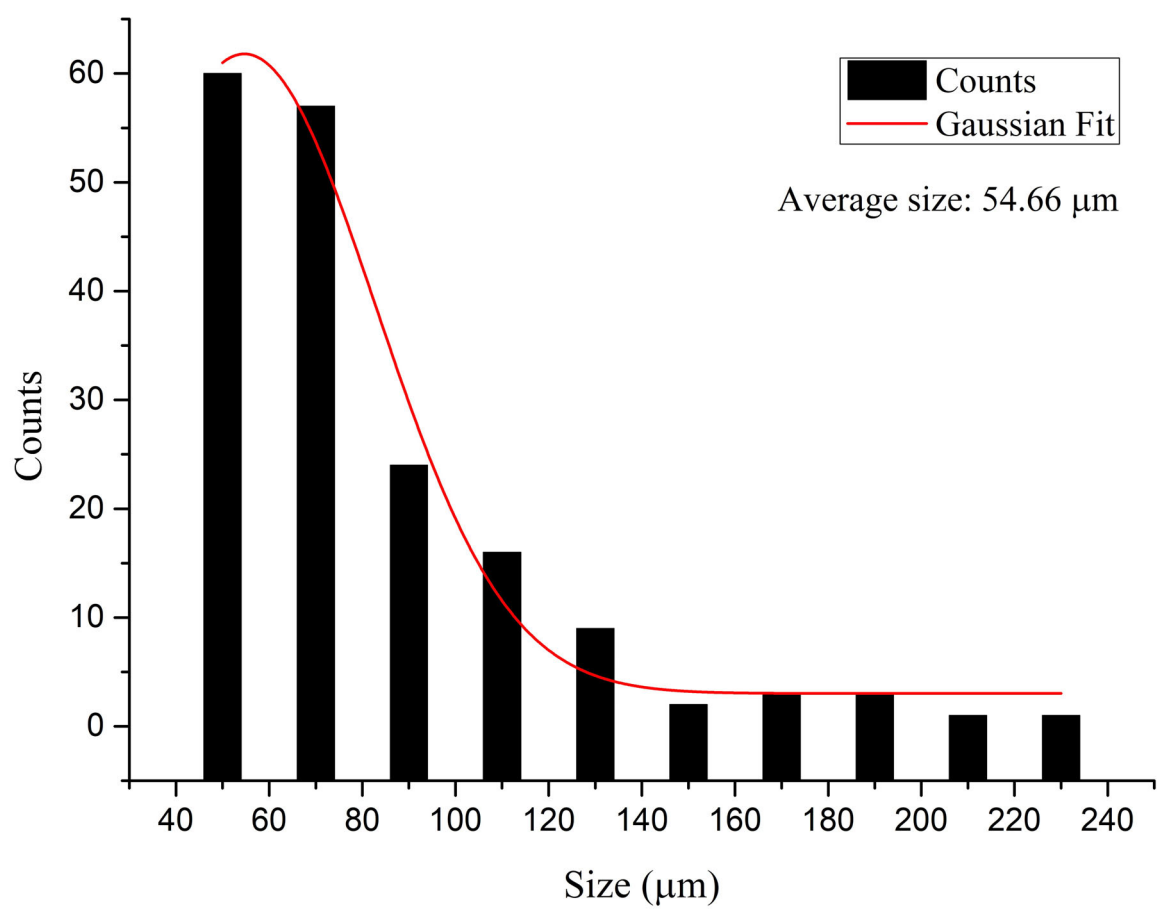

*Figure S3. Histogram of particle sizes ranging between 50 and 230 μm (black bars), and gaussian fit (red line).*

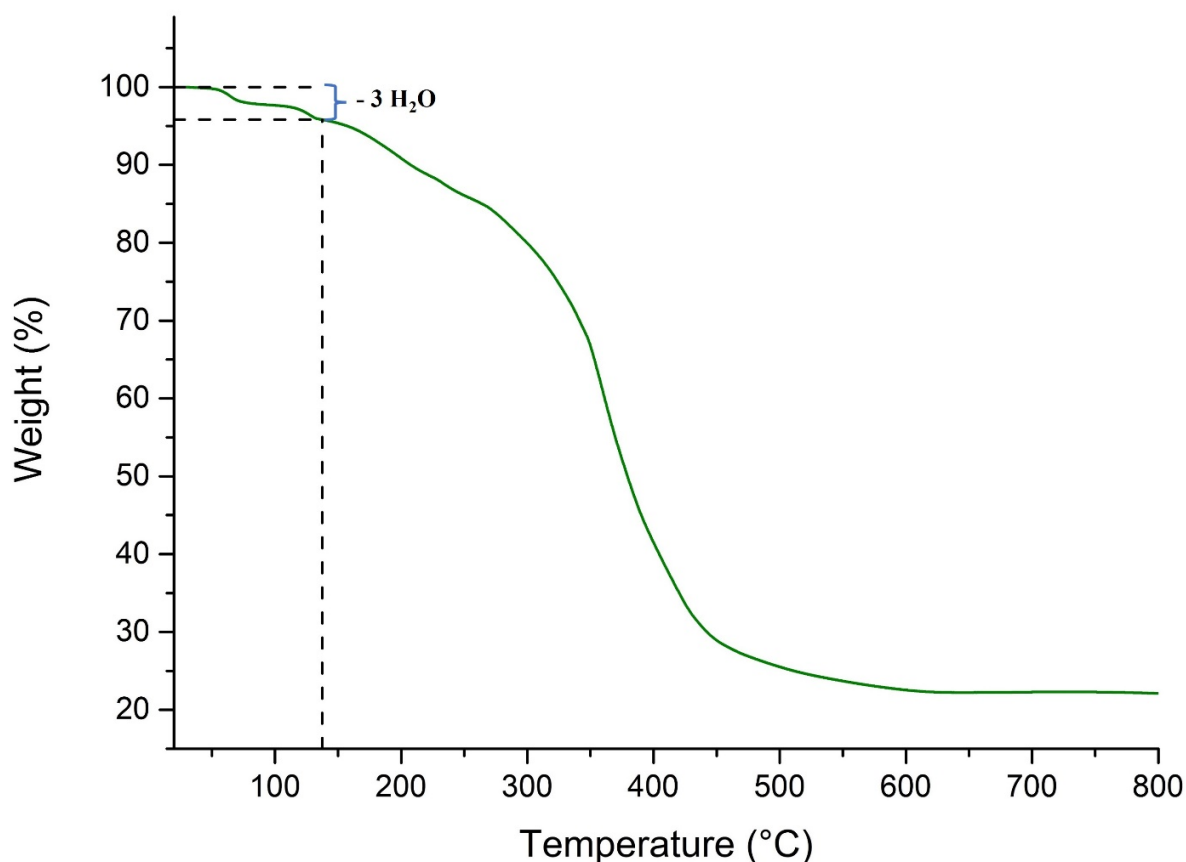

Figure S4. Thermogravimetric analysis (TGA) graph of  $[\text{Fe}_3\text{O}(\text{PhCO}_2)_6(\text{H}_2\text{O})_3] \cdot \text{PhCO}_2$  in the 25 – 800 °C temperature range.

## References

- [1] Psycharis, V., Raptopoulou, C. P., Boudalis, A. K., Sanakis, Y., Fardis, M., Diamantopoulos, G. & Papavassiliou, G. Syntheses, Structural, and Physical Studies of Basic Cr III and Fe III Benzoates and Benzoates: Evidence of Antisymmetric Exchange and Distributions of Isotropic and Antisymmetric Exchange Parameters. *Eur. J. Inorg. Chem.* **2006**, 2006, 3710–3723. <https://doi.org/10.1002/ejic.200600306>.
- [2] Georgopoulou, A. N., Sanakis, Y., Psycharis, V., Raptopoulou, C. P. & Boudalis, A. K. Mössbauer spectra of two extended series of basic iron(III) carboxylates  $[\text{Fe}_3\text{O}(\text{O}_2\text{CR})_6(\text{H}_2\text{O})_6]\text{A}$  ( $\text{A}^- = \text{ClO}_4^-$ ,  $\text{NO}_3^-$ ). *Hyperfine Interact.* **2010**, 198, 229–241. <https://doi.org/10.1007/s10751-010-0179-2>.
- [3] Cadelnic, I., Shova, S., Simonov, Y.A., Cendrowska, E., Gdaniec, M., Jovmir, T., Turta, C. and Bulhac, I. Crystal and molecular structure of  $[\text{Fe}_3\text{O}(\text{C}_6\text{H}_5\text{COO})_6(\text{H}_2\text{O})_3] \cdot 3\text{-Cl-PyH} \cdot (\text{CH}_3\text{C}_6\text{H}_4\text{SO}_3)_2 \cdot 2\text{H}_2\text{O}$ . *Pol. J. Chem.* **1997**, 71, 501–508.

[4] Schneider, C. A., Rasband, W. S. & Eliceiri, K. W. NIH Image to ImageJ: 25 years of image analysis. *Nat. Methods* **2012**, 9, 671–675.
